# 1 Selective isolation of mouse glial nuclei optimized for reliable 2 downstream omics analyses

3

4 Miguel A. Pena-Ortiz<sup>1†</sup>, Sarfraz Shafiq<sup>1†</sup>, Megan E. Rowland<sup>2</sup> and Nathalie G. Bérubé<sup>1\*</sup>

5

6 Affiliations:

7 <sup>1</sup>Departments of Anatomy and Cell Biology, Paediatrics, and Oncology, Schulich School of  
8 Medicine and Dentistry, Western University, London, ON, Division of Genetics and  
9 Development, Children's Health Research Institute, London, ON.

10

11 <sup>2</sup>Department of Biochemistry and Molecular Biology, The University of British Columbia,  
12 Vancouver, BC.

13

14 † These authors contributed equally to this work.

15 \* Corresponding author: Nathalie G. Bérubé ([nberube@uwo.ca](mailto:nberube@uwo.ca))

16

17 Short title: Isolation of glial nuclei from mouse brain

18

19 Abbreviations:

20 AST, astrocyte; BSC, back scatter; DAPI, 4',6-diamidino-2-phenylindole; DEPC, diethyl

21 pyrocarbonate; DNA, deoxyribonucleic acid; DTT, dithiothreitol; FACS, fluorescence-

22 activated cell sorting; FANS, fluorescence-activated nuclei sorting; FSC, forward Scatter;

23 GFP, green fluorescent protein; MACS, magnetic-activated cell sorting; MG, microglia; OLs,

24 oligodendrocytes; OPCs, oligodendrocyte precursor cells; PBS, phosphate buffered saline;

25 RIN, RNA integrity number; RNA, ribonucleic acid

26

27 Highlights

28 - Fast and easy isolation and sorting of glial nuclei from the mouse brain

29 - Reproducible and versatile processing of enriched nuclei for omics applications

## 30 **ABSTRACT**

### 31 *Background*

32 Isolation of cell types of interest from the brain for molecular applications presents several  
33 challenges, including cellular damage during tissue dissociation or enrichment procedures, and  
34 low cell number in the tissue in some cases. Techniques have been developed to enrich distinct  
35 cell populations using immunopanning or fluorescence activated cell/nuclei sorting. However,  
36 these techniques often involve fixation, immunolabeling and DNA staining steps, which could  
37 potentially influence downstream omics applications.

### 38 *New Method*

39 Taking advantage of readily available genetically modified mice with fluorescent-tagged  
40 nuclei, we describe a technique for the purification of cell-type specific brain nuclei, optimized  
41 to decrease sample preparation time and to limit potential artefacts for downstream omics  
42 applications. We demonstrate the applicability of this approach for the purification of glial cell  
43 nuclei and show that the resulting cell-type specific nuclei obtained can be used effectively for  
44 omics applications, including ATAC-seq and RNA-seq.

### 45 *Results*

46 We demonstrate excellent enrichment of fluorescently-tagged glial nuclei, yielding high  
47 quality RNA and chromatin. We identify several critical steps during nuclei isolation that help  
48 limit nuclei rupture and clumping, including quick homogenization, dilution before filtration  
49 and loosening of the pellet before resuspension, thus improving yield. Sorting of fluorescent  
50 nuclei can be achieved without fixation, antibody labelling, or DAPI staining, reducing  
51 potential artifactual results in RNA-seq and ATAC-seq analyses. We show that reproducible  
52 glial cell type-specific profiles can be obtained in transcriptomic and chromatin accessibility  
53 assays using this rapid protocol.

### 54 *Comparison with existing methods*

55 Our method allows for rapid enrichment of glial nuclei populations from the mouse brain with  
56 minimal processing steps, while still providing high quality RNA and chromatin required for  
57 reliable omics analyses.

### 58 *Conclusions*

59 We provide a reproducible method to obtain nucleic material from glial cells in the mouse brain  
60 with a quick and limited sample preparation.

61

## 62 **KEYWORDS**

63 Glia

64 Nuclei isolation

65 Fluorescence-activated sorting

66 Mouse brain

67 Omics

## 68 1. INTRODUCTION

69 Glial cells regulate essential processes of the central nervous system during development  
70 and in the adult brain like myelination, immune response, dendritogenesis, neuromodulation,  
71 and synapse formation, maturation and elimination (Matejuk and Ransohoff, 2020; Vainchtein  
72 and Molofsky, 2020). Of the different glial cells, astrocytes, oligodendrocytes and microglia  
73 are the most studied, due to their different roles in the nervous system physiology and disease  
74 (Allen and Lyons, 2018). Astrocytes directly form signalling networks with neurons (Durkee  
75 and Araque, 2019) and are therefore integral to nervous tissue function, including synapse  
76 formation and maintenance (Allen and Eroglu, 2017). Microglia are the resident immune cells  
77 of the brain but also participate in neuronal development, synaptogenesis and synapse  
78 maturation, through pruning and the release of molecules including nerve growth factor and  
79 tumor necrosis factor (Matejuk and Ransohoff, 2020; Reemst et al., 2016). Oligodendrocyte  
80 precursor cells (OPCs) not only differentiate into oligodendrocytes responsible for myelination  
81 throughout life but are also able to form synapses with neurons and may establish bidirectional  
82 communication (Sakry et al., 2014, 2011). Oligodendrocytes form the myelin sheath,  
83 regulating conduction across the axon, but can also regulate synaptic transmission through  
84 potassium clearance and the release of factors like brain derived neurotrophic factor (Xin and  
85 Chan, 2020).

86 The differentiation, maturation and function of glial cells are tightly regulated by changes  
87 in their chromatin and transcriptome (Hammond et al., 2019; Lattke et al., 2021; Marques et  
88 al., 2018). Epigenetic changes during development direct cell fate and, after maturation,  
89 regulate cellular function through regulation of the transcriptome (Bayraktar et al., 2015; Eggen  
90 et al., 2019; Tiane et al., 2019). There is also increasing evidence that continuous and plastic  
91 communication exists between different types of glia throughout life, highlighting the need to  
92 understand cell type-specific contributions and changes (Domingues et al., 2016; Nutma et al.,

93 2020; Vainchtein and Molofsky, 2020). The exploration of the transcriptome of glial cells and  
94 the correlation to chromatin architecture is therefore a key area of investigation that will expand  
95 our understanding of the role of these cells in physiological conditions and disease.

96 *In vivo* studies in the mouse brain provide several advantages over culture, the most salient  
97 being the ability to amalgamate all signals and their consequences in a complete system.  
98 However, *in vivo* molecular studies have been hampered by the heterogeneity of brain tissue,  
99 preventing the assignment of particular alterations to specific cell types (Maze et al., 2014).  
100 The size of the cell type population is also relevant for glial cells, which tend to be fewer  
101 compared to neurons, or expression and chromatin differences might be confounded by higher  
102 levels in other cell types. Therefore, a necessary step for omics studies of brain cells is to purify,  
103 or at least enrich, for a cell type of interest prior to molecular analyses. To this end, several  
104 methods have been developed to enrich for particular cell types of interest, include sorting of  
105 immunolabelled cells or nuclei of the desired cell type (Douvaras and Fossati, 2015; Holt and  
106 Olsen, 2016; John Lin et al., 2017).

107 The first step in many protocols involves an enzymatic digestion to dissociate brain tissue  
108 into cell suspensions. The digestion time and type of enzymes must be carefully optimized to  
109 minimize loss of antigen targets of antibodies used in subsequent steps (Barres, 2014).  
110 Although these methods allow the isolation of whole cells, loss of membrane integrity from  
111 sheer stress can induce stress signals and could alter chromatin structure and gene expression  
112 profiles (Mo et al., 2015). Once a cell suspension is obtained, different approaches can be used  
113 to enrich for a specific cell type. Immunopanning is commonly used for this purpose and  
114 involves sequential plating of cell suspensions on antibody-coated plates to deplete cell  
115 populations based on membrane markers (Foo et al., 2011). This approach is most suitable to  
116 maintain and study these cell populations in culture; however, transcriptional changes are  
117 known to occur *in vitro*, and might not reflect the state of the cell prior to cell collection.

118 Alternatively, cells can be either labeled with fluorophore-tagged antibodies and isolated using  
119 fluorescence-activated cell sorting (Cahoy et al., 2008; Guez-Barber et al., 2012), or labeled  
120 with magnetically tagged antibodies and isolated with magnetic-activated cell sorting (MACS,  
121 (Marek et al., 2008). Although these methods allow good enrichment of populations, changes  
122 in transcription and chromatin structure could occur due to the initial dissociation steps and  
123 prolonged manipulation. Both FACS and MACS require incubation periods with antibodies,  
124 and sorting might require long periods of time or multiple elution rounds in the case of MACS  
125 (Chongtham et al., 2021). Another limitation is that each glial cell type is itself heterogeneous,  
126 making it challenging to find antibodies that will select for all sub-populations. (Marques et  
127 al., 2016; Matias et al., 2019). In order to limit disruptions caused by stress response inherent  
128 to the cell dissociation step, it is possible to instead quickly dissociate all cell membranes to  
129 isolate nuclei (Binek et al., 2019; Chongtham et al., 2021; Mo et al., 2015). Similar to whole  
130 cells, cell type -specific nuclei can be labeled with antibodies and sorted. While early studies  
131 simply used NeuN to obtain neuronal and non-neuronal populations (Jiang et al., 2008),  
132 specific cell-type nuclear markers have been used for oligodendrocytes (Mendizabal et al.,  
133 2019) and microglia (Nott et al., 2019). Although changes in the chromatin and transcriptome  
134 caused by signals from outside the nuclei would be removed, serial incubations and  
135 manipulation may still affect yield by breaking the nuclei.

136 To avoid the use of antibodies, genetic approaches emerged to tag cells or nuclei of interest  
137 with fluorescent proteins. The commercially available mice B6;129-Gt(ROSA)26Sor<sup>tm5(CAG-</sup>  
138 <sup>Sun1/sfGFP)Nat/J</sup> (Mo et al., 2015), referred as Sun1-GFP , have a Cre-sensitive green fluorescent  
139 protein (GFP) and SUN1 nuclear lamina fusion protein that can be used to fluorescently tag  
140 nuclei of interest using cell-type specific Cre lines of mice (Mo et al., 2015). Available  
141 protocols for isolation and fluorescence activated nuclei sorting (FANS) require prolonged  
142 processing and manipulation before enrichment. To obtain nuclei suspensions, these methods

143 use time-consuming ultracentrifugation, as long as 2.5 h in gradients (Percoll or iodixanol) that  
144 might be expensive or not readily available (Jiang et al., 2008). In addition, several protocols  
145 stain nuclei with dyes like DAPI or propidium iodide to help remove doublets during sorting  
146 that could interfere with downstream applications (Chongtham et al., 2021; Mo et al., 2015).

147 Here, we present a time saving procedure for isolation of fluorescent nuclei that uses a  
148 readily available sucrose gradient, and does not require fixation, ultracentrifugation or other  
149 prolonged manipulations and incubations. We show that this method is suitable for glial cells,  
150 providing high yield of nuclei with limited clumping. Furthermore, high enrichment of  
151 fluorescent nuclei using FANS was achieved by removing nuclei doublets without the use of  
152 dyes or additional antibodies. Finally, we also show that the enriched nuclei can be used for  
153 omics analysis, as RNA sequencing and assay for transposase-accessible chromatin followed  
154 by sequencing (ATAC-seq) revealed profiles characteristic of astrocytes,  
155 OPCs/oligodendrocytes and microglia. Our simplified workflow limits complications during  
156 nuclei enrichment, prevents possible artefacts in downstream applications and provides high  
157 quality RNA and chromatin for omics analyses

158

## 159 2. MATERIALS AND METHODS

### 160 2.1 Animals

161 All procedures involving animals were conducted in accordance with the regulations of the  
162 Animals for Research Act of the province of Ontario, Canada and approved by the University  
163 of Western Ontario Animal Care and Use Committee (2017-048). Mice were exposed to 12-  
164 hour light/12-hour dark cycles and fed *ad libitum* with tap water and regular chow.

165 The Sun1-GFP mice were obtained from the Jackson Laboratories (B6;129-  
166 Gt(ROSA)26Sor<sup>tm5(CAG-Sun1/sfGFP)Nat/J</sup>, IMSR JAX:021039, MGI:5614796) (Mo et al. 2015).  
167 Homozygous Sun1-GFP female mice were mated with male mice heterozygous for the  
168 tamoxifen-inducible Cre recombinase gene under the control of promoters specific for each  
169 glial cell type used: B6 Glast-CreER (Tg(Slc1a3-cre/ERT)1Nat, IMSR JAX:012586,  
170 MGI:4430111) for astrocytes (Slezak et al., 2007), Sox10-CreER (Tg(Sox10-  
171 icre/ERT2)388Wdr, IMSR JAX:027651, MGI:5634390) for OPCs (McKenzie et al., 2014),  
172 and CX3CR11-CreER (B6.129P2(Cg)-Cx3cr1<sup>tm2.1(cre/ERT2)Litt/WganJ</sup>, ISMR JAX:021160,  
173 MGI:5617710) for microglia (Parkhurst et al., 2013).

### 174 2.2 Genotyping

175 Genomic DNA from ear punches was extracted by incubating samples with DirectPCR Lysis  
176 Reagent (Viagen 102-T) and Proteinase K at 55°C overnight. DNA was amplified using  
177 primers specific to different genetically engineered alleles (Supplementary Table 1) using  
178 FroggaMix (FroggaBio FBTAQM). PCR conditions started with 95°C for 3 min, followed by  
179 34 cycles of 95°C for 10s, 57°C for 20s and 72°C for 1min, ending with 72°C for 5 minutes.

### 180 2.3 Tamoxifen administration

181 Tamoxifen (10 mg, Sigma T5648) was mixed with 100 µl 95% Ethanol, incubated at 60°C  
182 until dissolved and diluted with 900 µl corn oil (Sigma C8267). Tamoxifen was injected  
183 intraperitoneally to induce Cre recombinase expression in different glial cell types. For OPCs  
184 and oligodendrocytes, Sun1-GFP lactating mothers crossed with Sox10-CreER males were

185 injected with 2 mg tamoxifen for three consecutive days; for astrocytes, post-natal day 10  
186 Glast-CreER;Sun1-GFP male pups were injected with 1 mg tamoxifen for three consecutive  
187 days; for microglia, 6 week-old CX3CR11-CreER;Sun1-GFP male mice were injected with 2  
188 mg for five consecutive days.

#### 189 *2.4 Tissue collection and nuclei isolation*

190 Mouse brains were dissected in ice cold phosphate buffered saline (PBS) and samples were  
191 frozen on dry ice before being stored at -80°C. Tissue was collected from tamoxifen-treated  
192 20-day old Sox10-Cre;Sun1-GFP males (forebrain), 1 month-old Glast-Cre;Sun1-GFP male  
193 mice (cortex) and from 2 month-old Cx3cr1-Cre;Sun1-GFP male mice (cortex and  
194 hippocampus). For nuclei isolation, the solutions were made fresh before each experiment  
195 using DEPC water (diethyl pyrocarbonate, Sigma D5758) and kept on ice. Frozen tissue was  
196 homogenized in 500µl of homogenization buffer [*HB*, 20 mM Tricine KOH, 25 mM MgCl<sub>2</sub>,  
197 250 mM sucrose, 1 mM DTT, 0.15 mM spermine, 0.5 mM spermidine, 0.1% IGEPAL-630, 1x  
198 protease inhibitor (Millipore Sigma 11873580001), 1 µl/ml RNaseOUT™ RNase inhibitor  
199 (Thermo Fisher Scientific 10777019)] with a pestle homogenizer for approximately one minute  
200 until a fine suspension was visible. The sample was then diluted to 7.5 ml with HB, filtered  
201 through a 40 µm strainer (Falcon 08-771-1) and carefully pipetted over 7.5 ml of cushion buffer  
202 [*CB*, 0.5 mM MgCl<sub>2</sub>, 0.88 M sucrose, 0.5 mM DTT, 1x protease Inhibitor (Millipore Sigma  
203 11873580001), 1 µl/ml RNaseOUT™ RNase inhibitor (Thermo Fisher Scientific 10777019)].  
204 Samples were centrifuged at 2800 x g for 20 mins at 4°C to pellet nuclei. The supernatant was  
205 carefully removed, and the pelleted nuclei were incubated for 10 min in resuspension buffer  
206 [*RB*, 500 µl 4% FBS, 0.15 mM spermine, 0.5 mM spermidine, 1 ul/ml RNaseOUT™ RNase  
207 inhibitor (Thermo Fisher Scientific 10777019) in PBS] and mixed by gentle pipetting.

208

209



## 210 *2.5 Fluorescence activated nuclei sorting*

211 Samples were filtered through a 20 µm strainer (pluriStrainer 43-10020-60) before sorting on  
212 a Sony SH800 Cell Sorter with a 100 µm nozzle, and the following gains for the sensors:  
213 FSC:14, BSC: 35%, FL1(EGFP):38%. Gating is initially set to discard larger events. Next,  
214 GFP intensity was plotted against GFP fluorescence area to eliminate doublets and nuclei  
215 clusters by discarding events with higher area. From this final gating step, events with lower  
216 GFP intensity were discarded to increase purity of the collected nuclei. Sample volumes  
217 sometimes needed to be adjusted with RB in order to maintain a constant flow of events per  
218 second. Sorting of the sample was paused throughout the session as needed to resuspend the  
219 sample and avoid clumping of the nuclei. For RNA extraction, sorting was also paused to mix  
220 the sorted nuclei with the lysis buffer in the collection tubes (described below). To assess the  
221 enrichment of GFP<sup>+</sup> nuclei in the final sorted nuclei population, 5000 to 10000 nuclei were  
222 collected in PBS and an aliquot of the suspension was mixed with 1 µg/ml DAPI and placed on  
223 a glass slide. The proportion of GFP<sup>+</sup> nuclei was quantified with an inverted microscope (DMI  
224 6000b, Leica) and digital camera (ORCA-ER, Hamamatsu).

## 225 *2.6 RNA purification and RNA-seq library preparation*

226 Sorted Sun1-GFP<sup>+</sup> nuclei were collected in 100 µl lysis buffer from the Single cell RNA  
227 purification kit (NorgenBiotek 51800) with 2% β-mercaptoethanol. Immediately after sorting,  
228 additional lysis buffer was added to reach 600 µl of total lysate volume, as well as 600 µl 70%  
229 ethanol. RNA purification was performed according to the manufacturer's instructions,  
230 including an in-column DNase treatment. Samples were eluted twice from the column with 8-  
231 12 µl of elution buffer. RNA concentration was determined using Qubit fluorometer  
232 (Invitrogen) according to the manufacturer's instructions using 1-2 µl of sample. RNA integrity  
233 was determined using an Agilent Bioanalyzer. Libraries from microglia samples were  
234 constructed using 35 ng of RNA with the VAHTS Universal V8 RNA-seq Library Prep Kit for

235 Illumina (Vazyme NR605-01), while astrocyte and OPC/oligodendrocyte libraries were made  
236 with 90 ng of RNA using VAHTSTM Total RNA-seq (H/M/R) Library Prep Kit for Illumina  
237 (Vazyme NR603-01) following the manufacturer's instructions.

### 238 *2.7 Assay for transposase-accessible chromatin (ATAC)*

239 Approximately 150,000 sorted Sun1-GFP<sup>+</sup> nuclei were collected in 50 µl of RNase free PBS.  
240 To concentrate the nuclei, the suspension was centrifuged at 3,000 rpm for 5 minutes at 4°C.  
241 The supernatant was then carefully removed, and nuclei were resuspended in tagmentation  
242 buffer containing Tn5 transposase (Vazyme TD501) for 45 min. at 37°C. Column purification  
243 of the samples was quickly performed with QIAquick PCR Purification Kit (Qiagen 28104) to  
244 end the tagmentation reaction. Enrichment and purification of the libraries was done according  
245 to the TruePrep DNA kit instructions. Quantitative PCR was used to determine the number of  
246 enrichment cycles to reach one third saturation, and all the libraries were amplified with more  
247 than 12 PCR cycles. Clean-up of all sequencing libraries was performed with SPRIselect beads  
248 (Beckman Coulter). The size and purity of the libraries were assessed using an Agilent  
249 bioanalyzer before storing at -80°C.

### 250 *2.8 Deep sequencing and data analysis*

251 Pooled equimolar libraries were sequenced at Canada's Michael Smith Genome Sciences  
252 Centre (BC Cancer Research, Vancouver, BC, Canada, <https://www.bcgsc.ca>) using the  
253 Illumina HiSeq (Illumina Inc., San Diego, CA). The libraries were sequenced as a 150 bp paired  
254 end run. 50 million paired-end reads were obtained for RNA-seq and 100 million paired-end  
255 reads for ATAC-seq. Raw reads were pre-processed using Cutadapt and mapped against *Mus*  
256 *musculus* GRCm39 with HISAT2 for RNA-seq and bowtie2 for ATAC-seq. SAMtools was  
257 used to sort and convert SAM files. Gene abundance for RNA-seq was calculated using  
258 StringTie. ATAC-seq peaks were visualized using the Integrative genomic viewer IGV (Broad  
259 Institute). Heatmaps of differential gene expression from RNA-seq data were generated using

260 Heatmapper (Babicki et al., 2016) with single linkage hierarchical clustering and spearman  
261 rank correlation. Expression enrichment of cell type-specific transcription factors was  
262 calculated using the cell type-enriched lists and method described in Zhang et al., 2014. Briefly,  
263 by dividing the average for each cell type by the sum of the averages of the other cell types.

264 **3 RESULTS AND DISCUSSION**

265 We used available transgenic mice to obtain brain tissue with GFP tagged nuclei in astrocytes,  
266 microglia or OPC/oligodendrocytes. Optimized nuclei isolation was used to obtain nuclei  
267 suitable for FANS (Figure 1A). Sorted nuclei were then used for RNA or chromatin extraction,  
268 followed by the corresponding procedures for RNA-seq and ATAC-seq (Figure 1B).

269

270

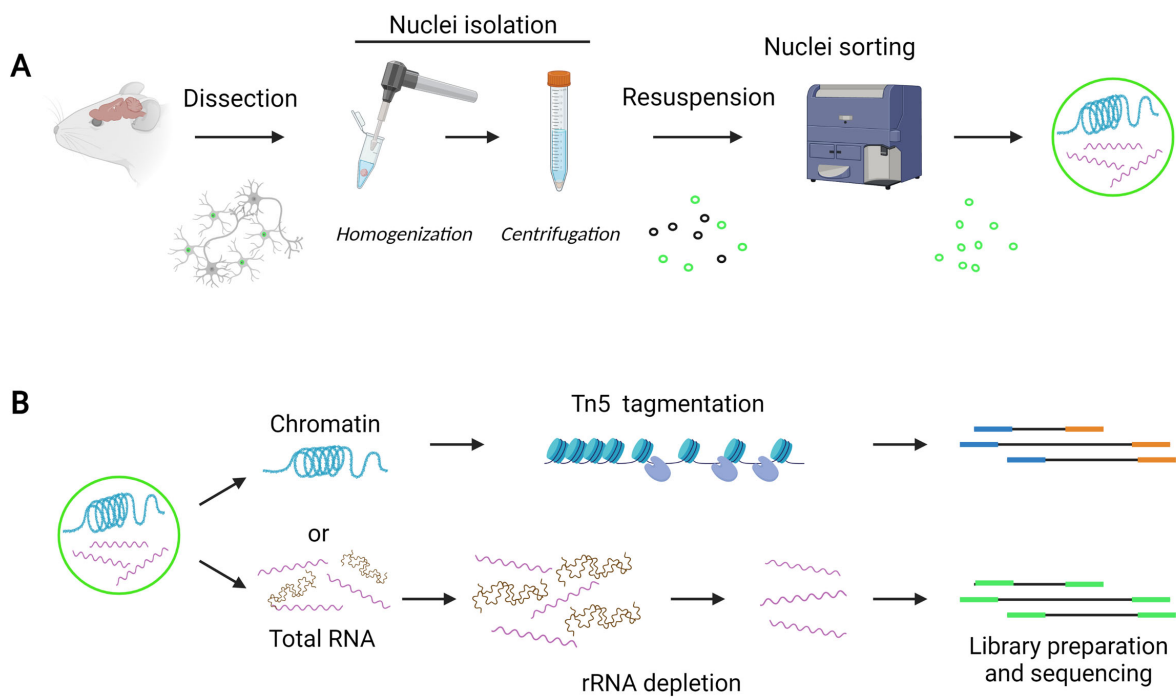

271

272 Figure 1. *Protocol overview*. (A) Tamoxifen-treated mice that express Sun1-GFP in astrocytes,  
273 OPC/oligodendrocytes or microglia are sacrificed, and brain tissue dissected and snap frozen.  
274 After tissue homogenization, nuclei are isolated by centrifugation and sorted to enrich for  
275 Sun1-GFP-tagged nuclei. (B) Sun1-GFP nuclei are immediately processed for total RNA  
276 extraction or chromatin accessibility assay (ATAC-seq) using Tn5. Ribosomal RNA is  
277 depleted from total RNA samples before generation of the RNA-seq libraries.

278

279

### 280 *3.1 Nuclei isolation and sorting*

281 We based this nuclei isolation protocol on the method previously published by (Mo et al.,  
282 2015). We observed loss of nuclei through homogenization and centrifugation steps, probably  
283 due to astringent conditions that affected nuclei integrity. To address this, we optimized the  
284 homogenization step and chose a nuclei pelleting centrifugation with sucrose gradient instead  
285 of a iodixanol gradient interlayer collection (Figure 2A). We modified the amount of detergent  
286 and length of dounce homogenization to maximize yield and integrity of the nuclei while  
287 limiting aggregation and clumping caused by leakage of the intranuclear material from ruptured  
288 nuclei (Maitra et al., 2021). To determine optimal detergent concentration and dounce time,  
289 frozen cortex tissue was homogenized in HB with 0.1%, 0.3% or 0.5% IGEPAL (Figure 2B).  
290 Samples were collected throughout the homogenization, stained with DAPI and quantified  
291 under a microscope. We observed that homogenization with 0.1% IGEPAL yielded the  
292 maximum number of nuclei with a dounce time of 105 s (Figure 2B and 2C). However, we  
293 observed that nuclei aggregation also increased with dounce time, potentially from rupture and  
294 leakage of a subset of nuclei. This clumping caused problems in the following steps, as it  
295 clogged filters during the filtration steps before sorting and ultimately decreased the final yield.  
296 Nuclei aggregates would also affect the sorting step, as they block the line or, if sorted, decrease  
297 purity. To prevent clumping of the nuclei, we used a dounce time of 1 min and pipetting was  
298 kept to a minimum with all nuclei suspensions. The nuclei yield obtained was enough for  
299 downstream applications with no clumping and minimal nuclei loss.

300 In addition to detergent concentration and dounce time during homogenization, we found that  
301 a key step to obtain high yield was dilution of the nuclei suspension prior to filtration. The  
302 nuclei dilution at this step prevents clumping, clogging of the strainer and diminishes loss of  
303 nuclei. Furthermore, nuclei yield was significantly improved by increasing the dilution of the  
304 suspension to 1:5 (Figure 2D). We used an equivalent volume of a sucrose gradient (CB) and

305 pelleted the nuclei, as we found this approach more efficient, cost-effective, and direct than  
 306 using commercial gradients such as iodixanol. These gradients require ultracentrifugation and  
 307 collection of the interlayer, which is difficult to visualize and obtain without leaving nuclei in  
 308 the gradient, leading to reduced yield. Nuclei pelleting with a sucrose gradient circumvents  
 309 these difficulties and allows nuclei resuspension in a buffer compatible with subsequent sorting  
 310 steps. We also found that a 10 min incubation in buffer before resuspension limited nuclei  
 311 rupture and clumping. Adding a filtration step just before sorting also decreased clumping  
 312 issues (Figure 2A).

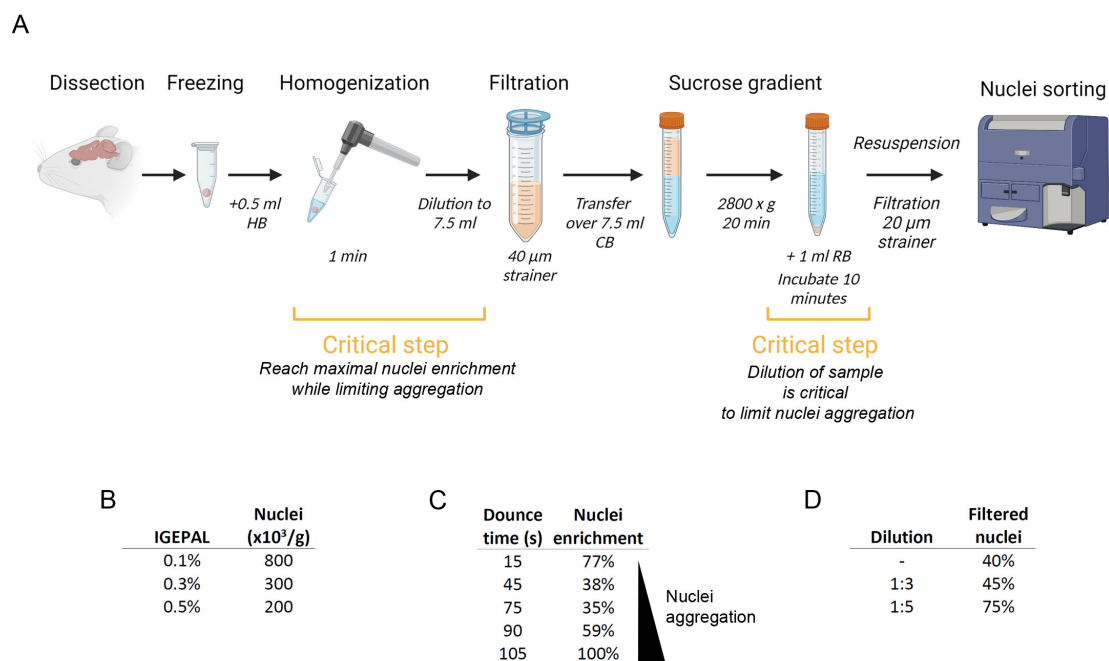

313

314 Figure 2. *Nuclei isolation protocol.* (A) Snap frozen brain tissue is homogenized with a pestle  
 315 homogenizer. The sample is diluted before filtration and transferred to a sucrose gradient.  
 316 Nuclei are pelleted through centrifugation, filtered and immediately sorted using a Sony SH800  
 317 Cell Sorter. (B) Maximum number of nuclei obtained throughout homogenization with  
 318 different detergent concentrations. (C) Nuclei counts and aggregation increase with dounce  
 319 time, GFP<sup>+</sup> enrichment as percentage of the maximum number obtained. (D) Nuclei yield after

320 filtration increases with dilution, enrichment as percentage of the nuclei counted before  
321 filtration.

322

323 For FANS, we first gated the majority of events detected in the forward and back scatter  
324 channels, excluding larger events that could represent aggregated nuclei (Figure 3A). As an  
325 alternative to the use of dyes like DAPI to detect and remove doublets and smaller clusters, we  
326 plotted GFP signal intensity versus area using the population from the first gating (Figure 3B).  
327 Singlets appear in the plot in a linear distribution, which were selected to exclude events below  
328 the line (doublets) and close to the origin (GFP<sup>-</sup>). These settings identify the population of  
329 Sun1-GFP<sup>+</sup> nuclei singlets in the suspension without any additional treatment or manipulation  
330 of the isolated nuclei. The gateings were optimized using GFP<sup>-</sup> samples, to further determine  
331 the background levels of signal. Finally, to increase purity, a histogram of GFP signal was  
332 plotted, and only events with highest fluorescence signal were collected (Figure 3C).

333 Samples collected before sorting and from GFP<sup>+</sup> or GFP<sup>-</sup> sorted nuclei were imaged to calculate  
334 the extent of Sun1-GFP<sup>+</sup> nuclei enrichment. GFP signal was visible in Sun1-GFP sorted nuclei,  
335 and no GFP signal was found in the gating for GFP<sup>-</sup> nuclei (Figure 3D). Our results indicate  
336 that this method allows enrichment above 90% for astrocytes and microglia nuclei (Figure 3E).  
337 We found that this high enrichment of GFP<sup>+</sup> nuclei depends heavily on the absence of nuclei  
338 doublets or clusters. As an example, we determined enrichment for astrocyte nuclei with and  
339 without the second gating for doublets and found that the purity of Sun1-GFP nuclei improved  
340 by 10% when doublets and clusters were excluded (Figure 3F).

341

342

343

344

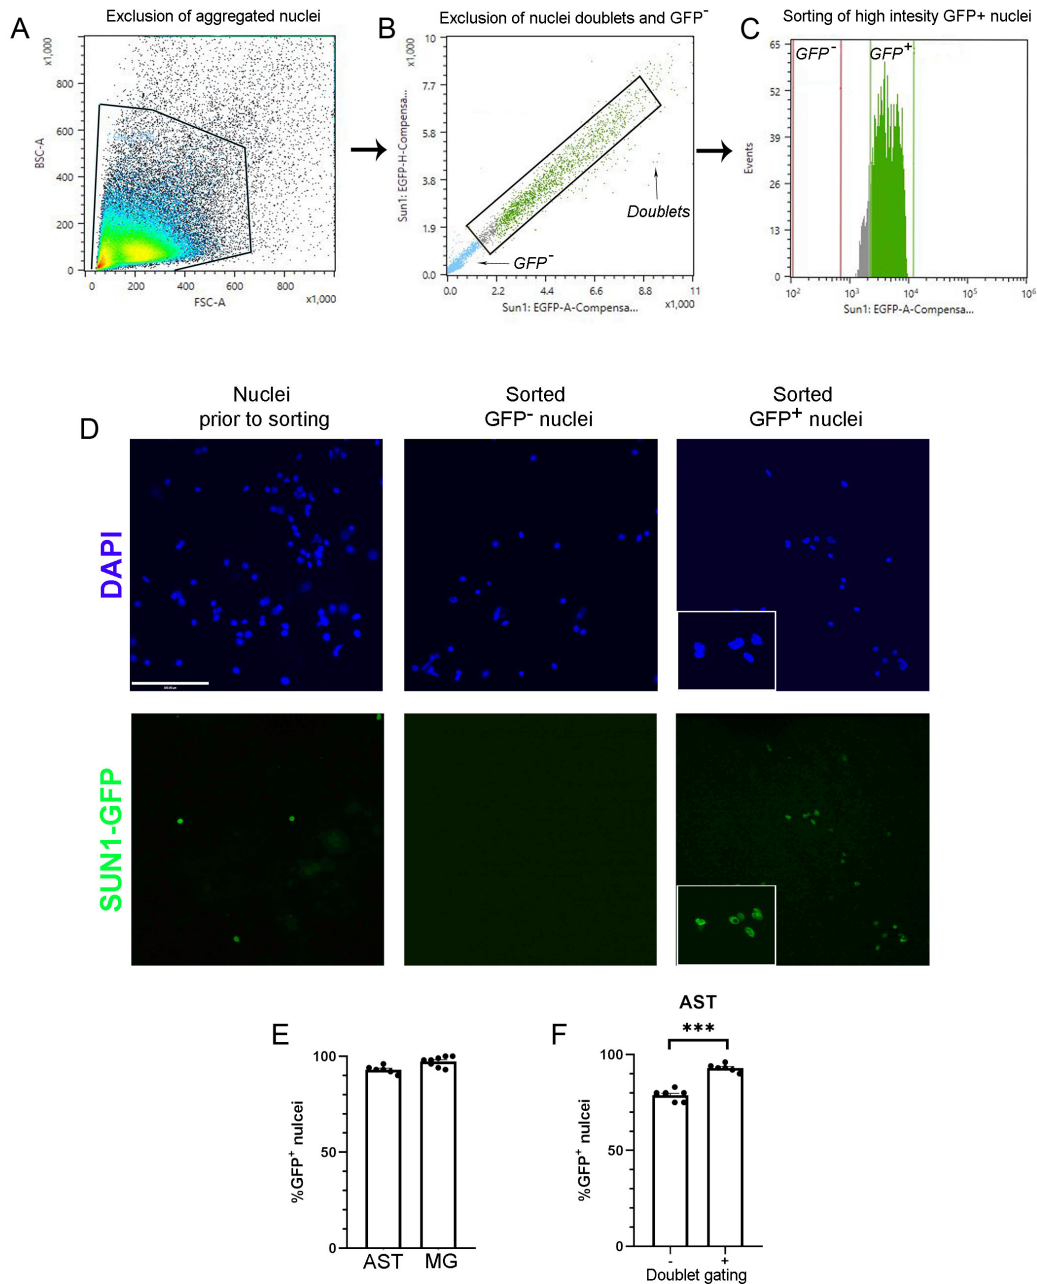

345

346 Figure 3. *High enrichment of GFP tagged nuclei obtained through FANS.* Representative  
 347 images of the gating settings used to sort Sun1-GFP nuclei. (A) Gating set to discard clumps,  
 348 events higher in the forward and back scattered channels; (B) population gated in A was then  
 349 plotted according to EGFP signal intensity and area to identify nuclei singlets and remove  
 350 doublets; (C) only nuclei singlets from the black box in B with higher EGFP signal intensity  
 351 (shown in green) are collected, whereas events with lower EGFP signal (grey) are discarded.



352 (D) DAPI-stained nuclei obtained before sorting or from sorted GFP<sup>-</sup> and GFP<sup>+</sup> collection tubes  
353 (E) Enrichment of Sun1-GFP<sup>+</sup> sorted astrocyte (AST) or microglia (MG) nuclei (mean +/-  
354 SEM, n=6-8). (F) Enrichment of Sun1-GFP<sup>+</sup> sorted nuclei as % of GFP tagged nuclei for  
355 astrocyte nuclei with or without gating to remove doublets, \*\*\*p<0.0001 unpaired t-test (n=6).

356

### 357 *3.2 RNA extraction yield and quality.*

358 To maintain high RNA quality and yield, we paused sorting a handful of times to vortex the  
359 collection tube to ensure proper mixing of the nuclei in sheath solution with the lysis buffer.  
360 Collection in the lysis buffer facilitates downstream processing, as lysis of the nuclei starts as  
361 they are collected and does not require additional concentration steps before RNA extraction.  
362 We also added 2-mercaptoethanol (2% final concentration) to the collection tube to account  
363 for the volume of sheath solution containing the sorted nuclei. The RNA yield varied depending  
364 on the type of cell: 70 – 240 ng of RNA for astrocytes, 170 – 370 ng for OPCs/oligodendrocytes  
365 and 57 – 95 ng for microglia (Figure 4A). However, it is important to point out that these  
366 numbers cannot be compared directly because the samples used for each cell type were  
367 collected from different brain regions, at different time points. Moreover, each model uses  
368 distinctive Cre driver lines with presumably different Cre expression. The regimen of  
369 tamoxifen administration was also very different between animal models.

370 Interestingly, in the case of astrocytes and microglia, the amount of RNA obtained appears to  
371 be determined by the cell type and not the number of nuclei. To better visualize the cell type-  
372 specific differences in the RNA yield obtained, we calculated the amount of RNA per nuclei  
373 and saw that microglia have significantly lower RNA content per nuclei and the results are less  
374 variable compared to astrocytes and OPC/Oligodendrocytes (Figure 4B). These results indicate  
375 that there might be cell type-specific differences in the RNA content in the nuclei of glial cells.  
376 To validate the quality of RNA extraction, we selected astrocytes and OPC/Oligodendrocytes

377 for RIN analysis. Electrogram profiles and RIN from the Agilent bioanalyzer indicate that our  
378 protocol produced high integrity RNA (Figure 4C), as all RNA samples are above the quality  
379 threshold of a RIN above 7 for the glial cell types analyzed (Figure 4D). Therefore, despite  
380 differences in RNA content, enough high-quality RNA for further transcriptomic analysis can  
381 be obtained for each glial cell type with this method.

382

383

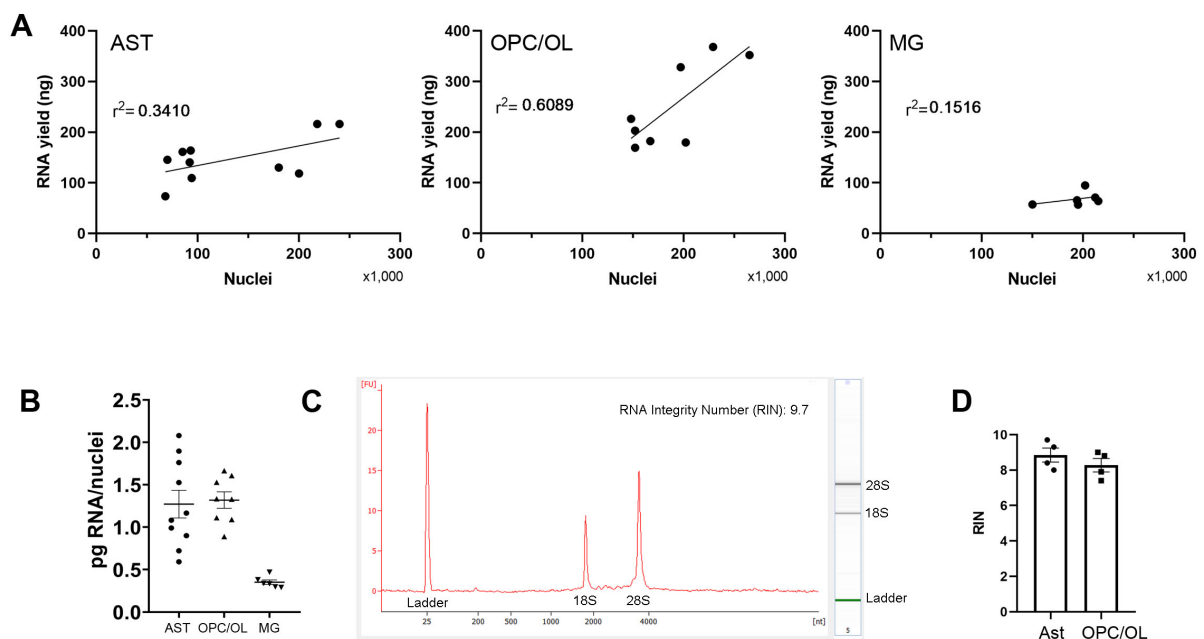

384

385 Figure 4. *High RNA yield and quality from Sun1-GFP nuclei obtained through FANS.* (A)  
386 Correlation between RNA extracted from the respective nuclei collected for astrocytes (AST)  
387 ( $p=0.0763$ ), OPC/Oligodendrocytes (OPC/OLs) ( $p=0.0223$ ) and microglia (MG) ( $p=0.4455$ ).  
388 (B) Calculated RNA content per nuclei obtained for every sorting session for each cell type  
389 analyzed, \*\*\* $p<0.0001$  One-way ANOVA with Tukey's Multiple comparisons (AST  $n=10$ ,  
390 OPC/OL  $n=8$ , MG  $n=6$ ). (C) Representative electrogram and gel view from Agilent  
391 Bioanalyzer used for RIN analysis. (D) Quality of RNA extraction as shown in RIN values of  
392 RNA samples extracted from astrocytes and OPC/OLs sorted nuclei ( $n=4$ ).

393

394 *3.3 Cell type-specific gene expression and chromatin availability.*

395 We performed RNA-seq with three biological replicates using the RNA from sorted nuclei of  
396 astrocytes, microglia, and OPC/Oligodendrocytes. To further validate our approach, we  
397 compared the expression of well-known cell type-specific genes using the RNA-seq  
398 transcriptome data. Hierarchical clustering of these genes shows that indeed, the cell type-  
399 specific sets are enriched in their corresponding sample (Figure 5A). To further characterize  
400 our enriched populations, we used sets of transcription factors differentially expressed in each  
401 glial cell type, previously reported by Zhang et al., 2014 (Figure 5B), and observed distinct  
402 enrichment for the corresponding glial cell type and appropriate clustering of the samples. We  
403 also observe that astrocytes and OPC/Oligodendrocytes samples show higher similarity,  
404 compared to microglia. The distinct clustering of each cell type based on gene expression  
405 further validates that we obtained an enriched population of the desired glial cells, and that our  
406 optimized method provides a useful tool to analyze the transcriptome of enriched nuclei  
407 populations.

408 Astrocytes and microglia were selected for the validation of cell type-specific chromatin  
409 accessibility on sorted nuclei. We therefore performed ATAC-seq with two biological  
410 replicates using the sorted nuclei of astrocytes and microglia. To visualize the tracks of ATAC-  
411 seq, we selected cell-type specific genes that showed differential gene expression in our RNA-  
412 seq data. Consistent with cell type-specific gene expression, ATAC-seq also showed the  
413 distinct cell type-specific chromatin accessibility peaks for microglia and astrocytes in selected  
414 regions. For example, astrocytes specific genes *Aldh1l1*, *Aqp4* and *Gfap* showed more open  
415 chromatin in astrocytes but not in microglia. Similarly, microglia specific genes *Clq*, *Csf1r*  
416 and *Trem2* showed more open chromatin only in microglia (Figure 5C). Similar to the  
417 transcriptomic results, chromatin accessibility assays reveal patterns characteristic of enriched

418 nuclei populations, confirming that our approach is suitable for omics analysis of the chromatin  
 419 as well as transcriptome.

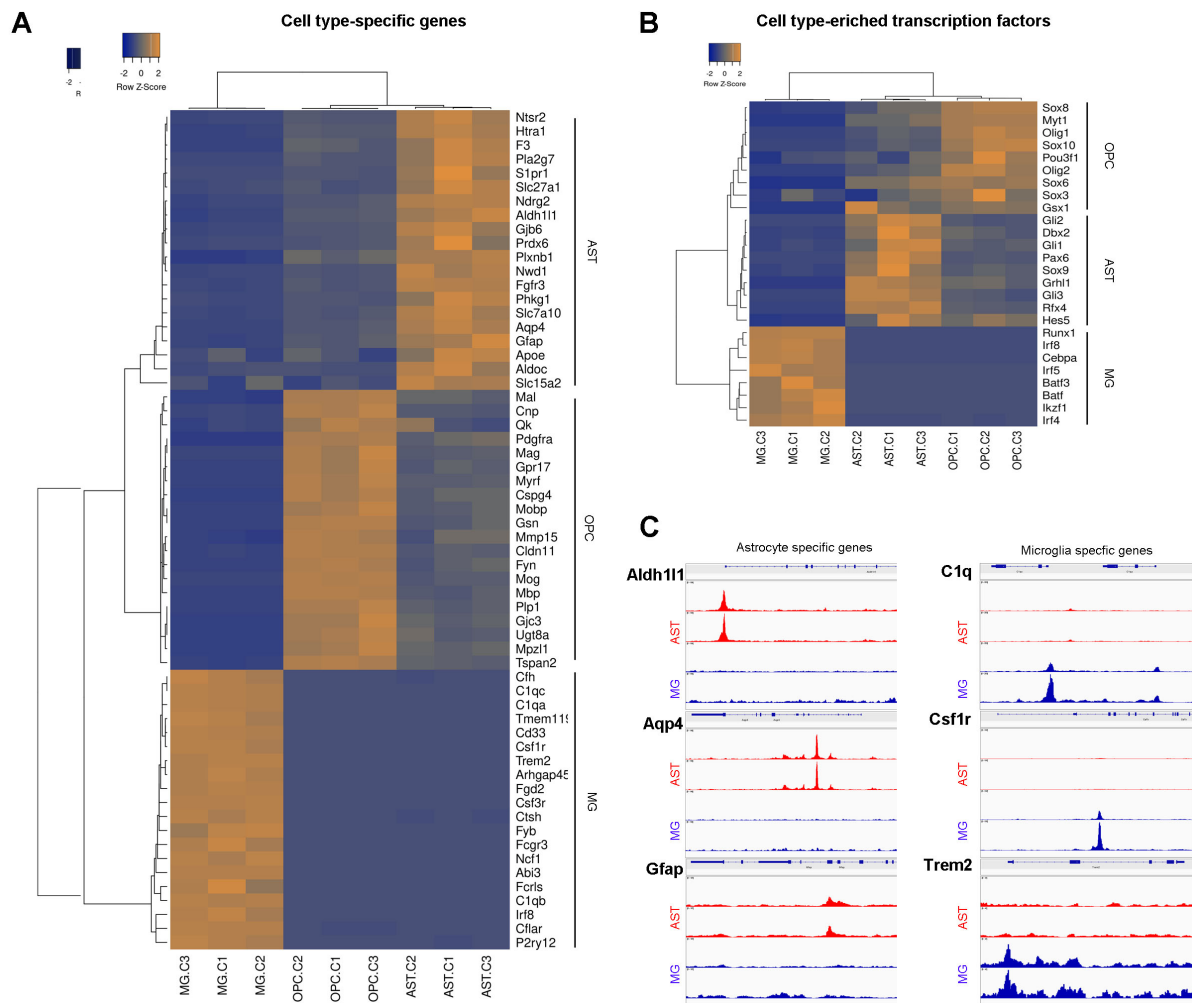

420  
 421 Figure 5. *Differential expression and chromatin availability of cell type-specific genes*  
 422 *determined by RNA-seq and ATAC-seq using sorted nuclei.* (A) Heatmap of RNA-seq  
 423 expression results with single linkage clustering and Spearman rank correlation shows higher  
 424 expression of the corresponding cell type-specific genes for astrocytes (AST),  
 425 OPC/Oligodendrocytes (OPC/OLs) and microglia (MG). (B) Enriched expression in the  
 426 corresponding glial cell of transcription factors reported in (Zhang et al., 2014) to be cell type-  
 427 enriched. (C) Chromatin availability from ATAC-seq analysis show distinct accessibility peak  
 428 pattern in cell type-specific genes with differential expression determined with RNA-seq.

429

430

#### 431 **4. CONCLUSION**

432 We present an optimized method for nuclei isolation and sorting of fluorescently tagged nuclei,  
433 applicable to a diverse population of cell types. Our method takes advantage of commercially  
434 available mouse lines that allow fluorescent labelling of nuclei from a variety of cell types of  
435 interest, avoiding the use of fixatives, antibodies or DNA dyes. The protocol used here for  
436 nuclei isolation and sorting consists of optimized, rapid and fewer manipulation steps, avoids  
437 cell dissociation stress while still yielding highly purified cell type-specific nuclei in sufficient  
438 quantity and quality for omics applications. This optimized protocol will therefore be a useful  
439 reference for the investigation of chromatin structure and gene expression in specific mouse  
440 brain cell types of interest.

441

#### 442 **Declaration of interest**

443 None

#### 444 **Funding**

445 This study was supported by operating funds from the Canadian Institutes for Health Research  
446 to NGB (MOP142369). The funders had no role in study design, data collection and analysis,  
447 decision to publish, or preparation of the manuscript.

448

#### 449 **ACKNOWLEDGEMENTS**

450 We thank Dr. Frank W. Pfrieger for facilitating the use of the Glast-CreER mouse line and  
451 Alireza Ghahramani for analysis of the ATAC-seq data obtained from astrocyte and microglia  
452 nuclei.

453

454

455

456

457

458 **Supplementary table 1: list of primer sequences**

| Genotyping primer | Forward Sequence 5'→3'         | Reverse Sequence 5'→3'        |
|-------------------|--------------------------------|-------------------------------|
| Sun1-GFP          | AAG GGA GCT GCA GTG GAG TA     | CGG GCC ATT TAC CGT AAG TTA T |
| Sox10-CreERT      | CAC CTA GGG TCT GGC ATG T      | CAG GTT TTG GTG CAC AGT CA    |
| Glast-CreERT      | ACA ATC TGG CCT GCT ACC AAA GC | CCA GTG AAA CAG CAT TGC TGT C |
| Cx3cr1-CreERT     | AAG ACT CAC GTG GAC CTG CT     | CGGTTATTCAACTTGAC CA          |

459

## REFERENCES

- 460  
461
- 462 Allen, N.J., Eroglu, C., 2017. Cell Biology of Astrocyte-Synapse Interactions. *Neuron* 96, 697–708.  
463 <https://doi.org/10.1016/j.neuron.2017.09.056>
- 464 Allen, N.J., Lyons, D.A., 2018. Glia as architects of central nervous system formation and function.  
465 *Science*. <https://doi.org/10.1126/science.aat0473>
- 466 Babicki, S., Arndt, D., Marcu, A., Liang, Y., Grant, J.R., Maciejewski, A., Wishart, D.S., 2016.  
467 Heatmapper: web-enabled heat mapping for all. *Nucleic acids research* 44, W147–W153.  
468 <https://doi.org/10.1093/nar/gkw419>
- 469 Barres, B.A., 2014. Designing and troubleshooting immunopanning protocols for purifying neural  
470 cells. *Cold Spring Harbor Protocols* 2014, 1342–1347. <https://doi.org/10.1101/pdb.ip073999>
- 471 Bayraktar, O.A., Fuentealba, L.C., Alvarez-Buylla, A., Rowitch, D.H., 2015. Astrocyte development and  
472 heterogeneity. *Cold Spring Harbor Perspectives in Biology* 7.  
473 <https://doi.org/10.1101/cshperspect.a020362>
- 474 Binek, A., Rojo, D., Godzien, J., Rupérez, F.J., Nunez, V., Jorge, I., Ricote, M., Vázquez, J., Barbas, C.,  
475 2019. Flow Cytometry Has a Significant Impact on the Cellular Metabolome. *Journal of*  
476 *Proteome Research* 18, 169–181. <https://doi.org/10.1021/acs.jproteome.8b00472>
- 477 Cahoy, J.D., Emery, B., Kaushal, A., Foo, L.C., Zamanian, J.L., Christopherson, K.S., Xing, Y., Lubischer,  
478 J.L., Krieg, P.A., Krupenko, S.A., Thompson, W.J., Barres, B.A., 2008. A transcriptome database  
479 for astrocytes, neurons, and oligodendrocytes: A new resource for understanding brain  
480 development and function. *Journal of Neuroscience* 28, 264–278.  
481 <https://doi.org/10.1523/JNEUROSCI.4178-07.2008>
- 482 Chongtham, M.C., Butto, T., Mungikar, K., Gerber, S., Winter, J., 2021. Intact vs. Fans for cell-type-  
483 specific nuclei sorting: A comprehensive qualitative and quantitative comparison. *International*  
484 *Journal of Molecular Sciences* 22. <https://doi.org/10.3390/ijms22105335>
- 485 Domingues, H.S., Portugal, C.C., Socodato, R., Relvas, J.B., 2016. Oligodendrocyte, astrocyte, and  
486 microglia crosstalk in myelin development, damage, and repair. *Frontiers in Cell and*  
487 *Developmental Biology*. <https://doi.org/10.3389/fcell.2016.00071>
- 488 Douvaras, P., Fossati, V., 2015. Generation and isolation of oligodendrocyte progenitor cells from  
489 human pluripotent stem cells. *Nature Protocols* 10, 1143–1154.  
490 <https://doi.org/10.1038/nprot.2015.075>
- 491 Durkee, C.A., Araque, A., 2019. Diversity and Specificity of Astrocyte–neuron Communication.  
492 *Neuroscience*. <https://doi.org/10.1016/j.neuroscience.2018.11.010>
- 493 Eggen, B.J.L., Boddeke, E.W.G.M., Kooistra, S.M., 2019. Regulation of Microglia Identity from an  
494 Epigenetic and Transcriptomic Point of View. *Neuroscience*.  
495 <https://doi.org/10.1016/j.neuroscience.2017.12.010>
- 496 Foo, L.C., Allen, N.J., Bushong, E.A., Ventura, P.B., Chung, W.S., Zhou, L., Cahoy, J.D., Daneman, R.,  
497 Zong, H., Ellisman, M.H., Barres, B.A., 2011. Development of a method for the purification and  
498 culture of rodent astrocytes. *Neuron* 71, 799–811.  
499 <https://doi.org/10.1016/j.neuron.2011.07.022>

- 500 Guez-Barber, D., Fanous, S., Harvey, B.K., Zhang, Y., Lehrmann, E., Becker, K.G., Picciotto, M.R., Hope,  
501 B.T., 2012. FACS purification of immunolabeled cell types from adult rat brain. *Journal of*  
502 *Neuroscience Methods* 203, 10–18. <https://doi.org/10.1016/j.jneumeth.2011.08.045>
- 503 Hammond, T.R., Dufort, C., Dissing-Olesen, L., Giera, S., Young, A., Wysoker, A., Walker, A.J., Gergits,  
504 F., Segel, M., Nemesh, J., Marsh, S.E., Saunders, A., Macosko, E., Ginhoux, F., Chen, J., Franklin,  
505 R.J.M., Piao, X., McCarroll, S.A., Stevens, B., 2019. Single-Cell RNA Sequencing of Microglia  
506 throughout the Mouse Lifespan and in the Injured Brain Reveals Complex Cell-State Changes.  
507 *Immunity* 50, 253-271.e6. <https://doi.org/10.1016/j.immuni.2018.11.004>
- 508 Holt, L.M., Olsen, M.L., 2016. Novel applications of magnetic cell sorting to analyze cell-type specific  
509 gene and protein expression in the central nervous system. *PLoS ONE* 11.  
510 <https://doi.org/10.1371/journal.pone.0150290>
- 511 Jiang, Y., Matevossian, A., Huang, H.S., Straubhaar, J., Akbarian, S., 2008. Isolation of neuronal  
512 chromatin from brain tissue. *BMC Neuroscience* 9. <https://doi.org/10.1186/1471-2202-9-42>
- 513 John Lin, C.C., Yu, K., Hatcher, A., Huang, T.W., Lee, H.K., Carlson, J., Weston, M.C., Chen, F., Zhang,  
514 Y., Zhu, W., Mohila, C.A., Ahmed, N., Patel, A.J., Arenkiel, B.R., Noebels, J.L., Creighton, C.J.,  
515 Deneen, B., 2017. Identification of diverse astrocyte populations and their malignant analogs.  
516 *Nature Neuroscience* 20, 396–405. <https://doi.org/10.1038/nn.4493>
- 517 Latke, M., Goldstone, R., Ellis, J.K., Boeing, S., Jurado-Arjona, J., Marichal, N., MacRae, J.I.,  
518 Berninger, B., Guillemot, F., 2021. Extensive transcriptional and chromatin changes underlie  
519 astrocyte maturation in vivo and in culture. *Nature Communications* 12.  
520 <https://doi.org/10.1038/s41467-021-24624-5>
- 521 Maitra, M., Nagy, C., Chawla, A., Wang, Y.C., Nascimento, C., Suderman, M., Thérour, J.F.,  
522 Mechawar, N., Ragoussis, J., Turecki, G., 2021. Extraction of nuclei from archived postmortem  
523 tissues for single-nucleus sequencing applications. *Nature Protocols*.  
524 <https://doi.org/10.1038/s41596-021-00514-4>
- 525 Marek, R., Caruso, M., Rostami, A., Grinspan, J.B., Sarma, J. das, 2008. Magnetic cell sorting: A fast  
526 and effective method of concurrent isolation of high purity viable astrocytes and microglia from  
527 neonatal mouse brain tissue. *Journal of Neuroscience Methods* 175, 108–118.  
528 <https://doi.org/10.1016/j.jneumeth.2008.08.016>
- 529 Marques, S., van Bruggen, D., Vanichkina, D.P., Floriddia, E.M., Munguba, H., Våremo, L., Giacomello,  
530 S., Falcão, A.M., Meijer, M., Björklund, Å.K., Hjerling-Leffler, J., Taft, R.J., Castelo-Branco, G.,  
531 2018. Transcriptional Convergence of Oligodendrocyte Lineage Progenitors during  
532 Development. *Developmental Cell* 46, 504-517.e7.  
533 <https://doi.org/10.1016/j.devcel.2018.07.005>
- 534 Marques, S., Zeisel, A., Codeluppi, S., van Bruggen, D., Falcão, A.M., Xiao, L., Li, H., Häring, M.,  
535 Hochgerner, H., Romanov, R.A., Gyllborg, D., Muñoz-Manchado, A.B., la Manno, G.,  
536 Lönnerberg, P., Floriddia, E.M., Rezayee, F., Ernfors, P., Arenas, E., Hjerling-Leffler, J., Harkany,  
537 T., Richardson, W.D., Linnarsson, S., Castelo-Branco, G., 2016. Oligodendrocyte heterogeneity  
538 in the mouse juvenile and adult central nervous system. *Science* 352, 1326–1329.  
539 <https://doi.org/10.1126/science.aaf6463>
- 540 Matejuk, A., Ransohoff, R.M., 2020. Crosstalk Between Astrocytes and Microglia: An Overview.  
541 *Frontiers in Immunology*. <https://doi.org/10.3389/fimmu.2020.01416>



- 542 Matias, I., Morgado, J., Gomes, F.C.A., 2019. Astrocyte Heterogeneity: Impact to Brain Aging and  
543 Disease. *Frontiers in Aging Neuroscience*. <https://doi.org/10.3389/fnagi.2019.00059>
- 544 Maze, I., Shen, L., Zhang, B., Garcia, B.A., Shao, N., Mitchell, A., Sun, H.S., Akbarian, S., Allis, C.D.,  
545 Nestler, E.J., 2014. Analytical tools and current challenges in the modern era of  
546 neuroepigenomics. *Nature Neuroscience*. <https://doi.org/10.1038/nn.3816>
- 547 McKenzie, I.A., Ohayon, D., Li, H., de Faria, J.P., Emery, B., Tohyama, K., Richardson, W.D., 2014.  
548 Motor skill learning requires active central myelination. *Science* 346, 318–322.  
549 <https://doi.org/10.1126/science.1254960>
- 550 Mendizabal, I., Berto, S., Usui, N., Toriumi, K., Chatterjee, P., Douglas, C., Huh, I., Jeong, H., Layman,  
551 T., Tamminga, C.A., Preuss, T.M., Konopka, G., Yi, S. v., 2019. Cell type-specific epigenetic links  
552 to schizophrenia risk in the brain. *Genome Biology* 20. [https://doi.org/10.1186/s13059-019-](https://doi.org/10.1186/s13059-019-1747-7)  
553 [1747-7](https://doi.org/10.1186/s13059-019-1747-7)
- 554 Mo, A., Mukamel, E.A., Davis, F.P., Luo, C., Henry, G.L., Picard, S., Urich, M.A., Nery, J.R., Sejnowski,  
555 T.J., Lister, R., Eddy, S.R., Ecker, J.R., Nathans, J., 2015. Epigenomic Signatures of Neuronal  
556 Diversity in the Mammalian Brain. *Neuron* 86, 1369–1384.  
557 <https://doi.org/10.1016/j.neuron.2015.05.018>
- 558 Nott, A., Holtman, I.R., Coufal, N.G., Schlachetzki, J.C.M., Yu, M., Hu, R., Han, C.Z., Pena, M., Xiao, J.,  
559 Wu, Y., Keulen, Z., Pasillas, M.P., O'Connor, C., Nickl, C.K., Schafer, S.T., Shen, Z., Rissman, R.A.,  
560 Brewer, J.B., Gosselin, D., Gonda, D.D., Levy, M.L., Rosenfeld, M.G., McVicker, G., Gage, F.H.,  
561 Ren, B., Glass, C.K., 2019. Brain cell type-specific enhancer-promoter interactome maps and  
562 disease-risk association. *Science* 366, 1134–1139. <https://doi.org/10.1126/science.aay0793>
- 563 Nutma, E., van Gent, D., Amor, S., Peferoen, L.A.N., 2020. Astrocyte and Oligodendrocyte Cross-Talk  
564 in the Central Nervous System. *Cells*. <https://doi.org/10.3390/cells9030600>
- 565 Parkhurst, C.N., Yang, G., Ninan, I., Savas, J.N., Yates, J.R., Lafaille, J.J., Hempstead, B.L., Littman, D.R.,  
566 Gan, W.B., 2013. Microglia promote learning-dependent synapse formation through brain-  
567 derived neurotrophic factor. *Cell* 155, 1596–1609. <https://doi.org/10.1016/j.cell.2013.11.030>
- 568 Reemst, K., Noctor, S.C., Lucassen, P.J., Hol, E.M., 2016. The indispensable roles of microglia and  
569 astrocytes during brain development. *Frontiers in Human Neuroscience* 10.  
570 <https://doi.org/10.3389/fnhum.2016.00566>
- 571 Sakry, D., Karram, K., Trotter, J., 2011. Synapses between NG2 glia and neurons. *Journal of Anatomy*.  
572 <https://doi.org/10.1111/j.1469-7580.2011.01359.x>
- 573 Sakry, D., Neitz, A., Singh, J., Frischknecht, R., Marongiu, D., Binamé, F., Perera, S.S., Endres, K., Lutz,  
574 B., Radyushkin, K., Trotter, J., Mittmann, T., 2014. Oligodendrocyte Precursor Cells Modulate  
575 the Neuronal Network by Activity-Dependent Ectodomain Cleavage of Glial NG2. *PLoS Biology*  
576 12. <https://doi.org/10.1371/journal.pbio.1001993>
- 577 Slezak, M., Göritz, C., Niemiec, A., Frisé, J., Chambon, P., Metzger, D., Pfrieger, F.W., 2007.  
578 Transgenic mice for conditional gene manipulation in astroglial cells. *GLIA* 55, 1565–1576.  
579 <https://doi.org/10.1002/glia.20570>
- 580 Tiane, A., Schepers, M., Rombaut, B., Hupperts, R., Prickaerts, J., Hellings, N., van den Hove, D.,  
581 Vanmierlo, T., 2019. From OPC to Oligodendrocyte: An Epigenetic Journey. *Cells*.  
582 <https://doi.org/10.3390/cells8101236>

- 583 Vainchtein, I.D., Molofsky, A. v., 2020. Astrocytes and Microglia: In Sickness and in Health. Trends in  
584 Neurosciences. <https://doi.org/10.1016/j.tins.2020.01.003>
- 585 Xin, W., Chan, J.R., 2020. Myelin plasticity: sculpting circuits in learning and memory. Nature Reviews  
586 Neuroscience. <https://doi.org/10.1038/s41583-020-00379-8>
- 587 Zhang, Y., Chen, K., Sloan, S.A., Bennett, M.L., Scholze, A.R., O’Keeffe, S., Phatnani, H.P., Guarnieri, P.,  
588 Caneda, C., Ruderisch, N., Deng, S., Liddelow, S.A., Zhang, C., Daneman, R., Maniatis, T., Barres,  
589 B.A., Wu, J.Q., 2014. An RNA-sequencing transcriptome and splicing database of glia, neurons,  
590 and vascular cells of the cerebral cortex. *Journal of Neuroscience* 34, 11929–11947.  
591 <https://doi.org/10.1523/JNEUROSCI.1860-14.2014>
- 592
